# Supplementary material for: A Molecular Approach to the Sexing of the Triple Burial at the Upper Paleolithic Site of Dolní Věstonice
Source: PubMed Central journal article supplement (PMC5051676; doi:10.1371/journal.pone.0163019), 2016-10-05
Supplement: pone.0163019.s001.pdf [file pone.0163019.s001.pdf]

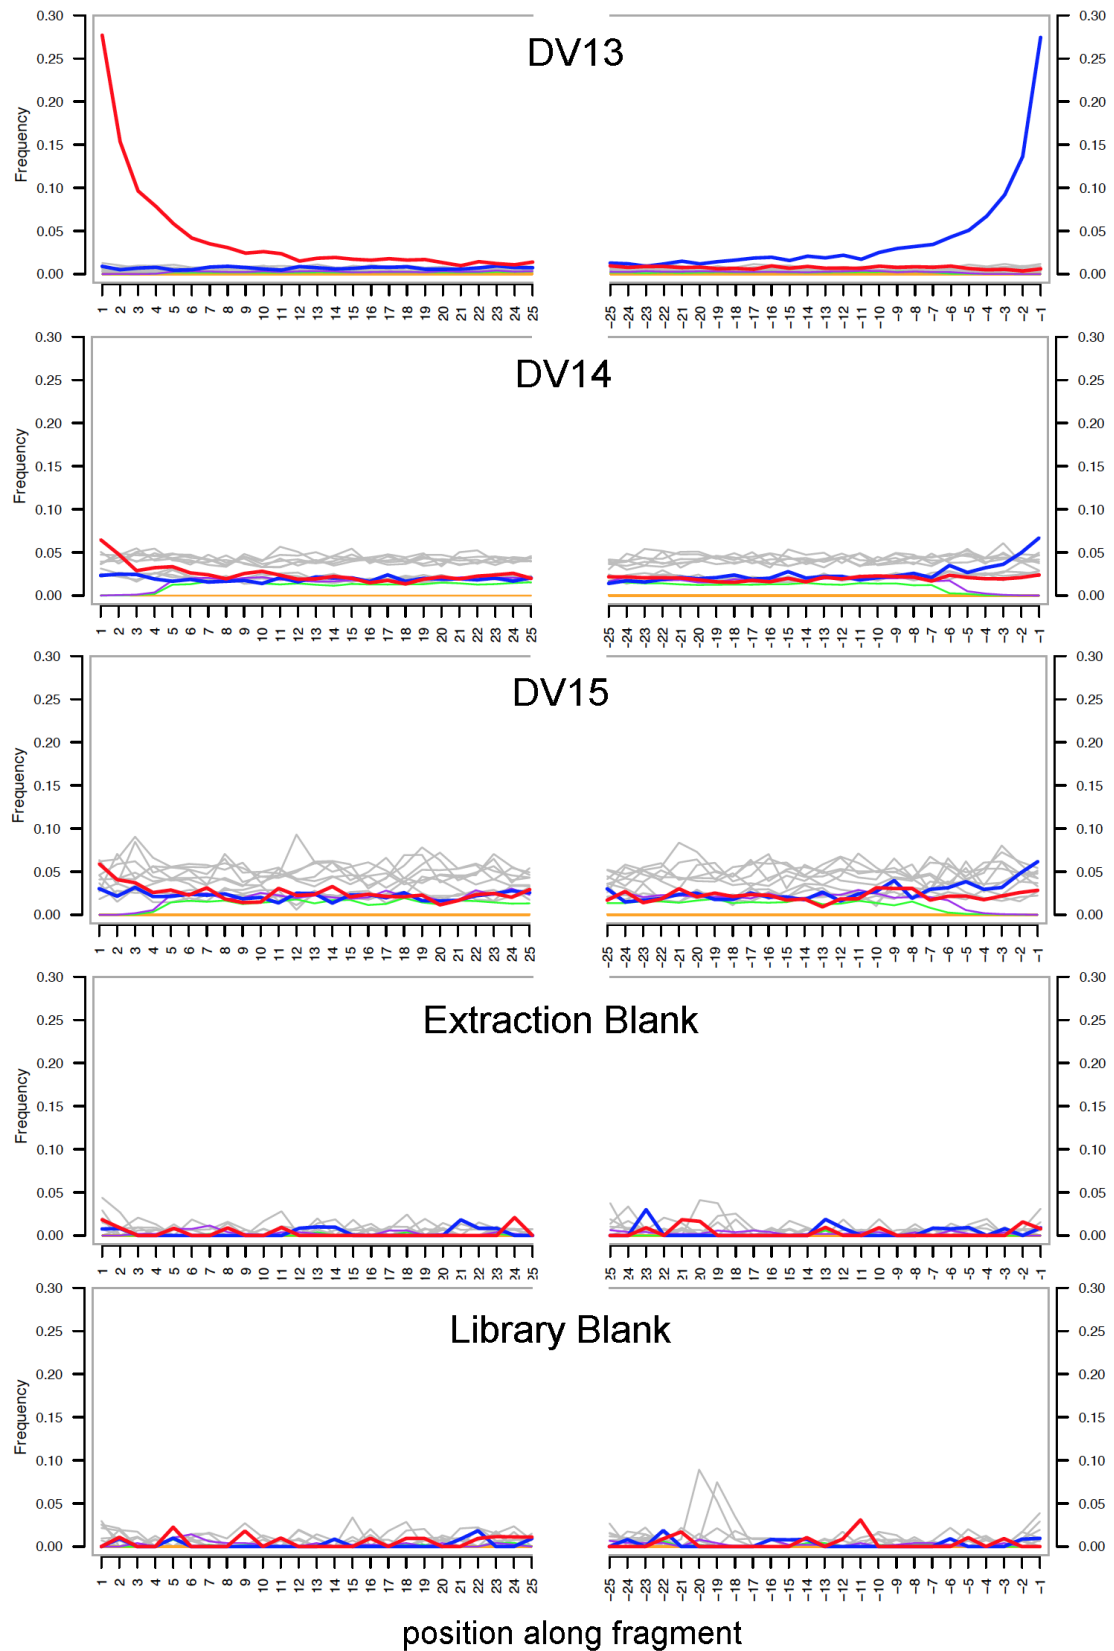

**Figure S1.** Patterns of deamination towards read ends. C-to-T (red) and G-to-A (blue) misincorporations shown at 5'- and 3'-ends, plots generated with mapDamage.
