# Supplementary material for: A Molecular Approach to the Sexing of the Triple Burial at the Upper Paleolithic Site of Dolní Věstonice
Source: PubMed Central journal article supplement (PMC5051676; doi:10.1371/journal.pone.0163019), 2016-10-05
Supplement: pone.0163019.s004.pdf [file pone.0163019.s004.pdf]

**Table S1.** Inference of biological sex using the Ry approach<sup>1</sup>

| Sample | Nseqs | NchrY+NchrX | NchrY | R_y    | SE     | 95% CI        | Assignment                    |
|--------|-------|-------------|-------|--------|--------|---------------|-------------------------------|
| DV 13  | 19598 | 492         | 42    | 0.0854 | 0.0126 | 0.0607-0.1101 | consistent with XY but not XX |
| DV 14  | 18527 | 477         | 31    | 0.065  | 0.0113 | 0.0429-0.0871 | consistent with XY but not XX |
| DV 15  | 15034 | 136         | 7     | 0.0515 | 0.0189 | 0.0143-0.0886 | Not Assigned                  |

Nseqs: Number of total alignments; NchrY+NchrX: Number of alignments to chrX or chrY; NchrY: Number of alignments to chrY

## References

- 1 Skoglund, P., Storå, J., Götherström, A. & Jakobsson, M. Accurate sex identification of ancient human remains using DNA shotgun sequencing. *J Archaeol Sci* **40**, 4477-4482, doi:10.1016/j.jas.2013.07.004 (2013).
