# Supplementary material for: A Molecular Approach to the Sexing of the Triple Burial at the Upper Paleolithic Site of Dolní Věstonice
Source: PubMed Central journal article supplement (PMC5051676; doi:10.1371/journal.pone.0163019), 2016-10-05
Supplement: pone.0163019.s005.pdf [file pone.0163019.s005.pdf]

**Table S2.** Inference of biological sex using the  $R_x$  approach

| <b>&gt;30bp</b> |              |             |             |       |             | <b>&gt; 30bp and post-mortem damage filtration</b> |             |             |       |             |
|-----------------|--------------|-------------|-------------|-------|-------------|----------------------------------------------------|-------------|-------------|-------|-------------|
| Sample          | mapped reads | mapped to X | mapped to Y | $R_x$ | 95% CI      | mapped reads                                       | mapped to X | mapped to Y | $R_x$ | 95% CI      |
| DV13            | 16099        | 368         | 35          | 0.433 | 0.409-0.456 | 4381                                               | 87          | 11          | 0.377 | 0.351-0.404 |
| DV14            | 8945         | 215         | 12          | 0.471 | 0.410-0.532 | 1250                                               | 30          | 1           | 0.475 | 0.411-0.538 |
| DV15            | 2788         | 73          | 5           | 0.536 | 0.444-0.628 | 396                                                | 9           | 2           | 0.510 | 0.409-0.612 |
