# Supplementary material for: A Molecular Approach to the Sexing of the Triple Burial at the Upper Paleolithic Site of Dolní Věstonice
Source: PubMed Central journal article supplement (PMC5051676; doi:10.1371/journal.pone.0163019), 2016-10-05
Supplement: pone.0163019.s006.pdf [file pone.0163019.s006.pdf]

**Table S3. Summary of sequencing results of negative controls**

| Sample           | Merged,<br>quality<br>filtered reads | Unique<br>human<br>reads | %<br>endogenous<br>DNA | Cluster<br>factor | %<br>deamination<br>at 5'-end | Using unfiltered reads |                 |                                     | Using reads filtered for post-mortem damage |        |            |
|------------------|--------------------------------------|--------------------------|------------------------|-------------------|-------------------------------|------------------------|-----------------|-------------------------------------|---------------------------------------------|--------|------------|
|                  |                                      |                          |                        |                   |                               | Rx                     | 95% CI          | Assignment                          | Rx                                          | 95% CI | Assignment |
| Extraction Blank | 225431                               | 444                      | 0.20                   | 1.97              | 1.81                          | 1.330                  | 0.778-<br>1.881 | consistent<br>with XX but<br>not XY | Too few reads for assignment                |        |            |
| Library Blank    | 311750                               | 411                      | 0.13                   | 2.17              | 1.81                          | 0.923                  | 0.829-<br>1.017 | XX                                  | Too few reads for assignment                |        |            |
