# Supplementary material for: A Molecular Approach to the Sexing of the Triple Burial at the Upper Paleolithic Site of Dolní Věstonice
Source: PubMed Central journal article supplement (PMC5051676; doi:10.1371/journal.pone.0163019), 2016-10-05
Supplement: pone.0163019.s007.pdf [file pone.0163019.s007.pdf]

**Table S4.** Down-sampled data from ancient individuals to test the minimum amount of reads required for Rx sex identification

DV13

| percentage | Nseq  | NchrX | NchrY | p-value   | Rx        | 95% CI              | Assignment   |
|------------|-------|-------|-------|-----------|-----------|---------------------|--------------|
| 1.0%       | 212   | 5     | 1     | 2.30E-04  | 0.5972325 | 0.388166-0.8062991  | not assigned |
| 5.0%       | 1039  | 29    | 2     | 4.22E-07  | 0.5275569 | 0.4772645-0.5778494 | XY           |
| 10%        | 2061  | 50    | 3     | 1.920E-07 | 0.460823  | 0.4197541-0.5018912 | XY           |
| 20%        | 3994  | 100   | 8     | 1.492E-08 | 0.474044  | 0.4365435-0.5115449 | XY           |
| 30%        | 5925  | 140   | 11    | 1.952E-08 | 0.443472  | 0.4093505-0.4775936 | XY           |
| 40%        | 7891  | 184   | 20    | 2.141E-08 | 0.438065  | 0.4046169-0.4715121 | XY           |
| 50%        | 9824  | 220   | 24    | 1.419E-08 | 0.421345  | 0.3907712-0.4519195 | XY           |
| 60%        | 11767 | 265   | 28    | 1.173E-08 | 0.423889  | 0.3936594-0.4541184 | XY           |
| 70%        | 13774 | 304   | 31    | 1.440E-08 | 0.415255  | 0.3856192-0.4448914 | XY           |
| 80%        | 15700 | 364   | 34    | 1.232E-08 | 0.436922  | 0.4053332-0.4685114 | XY           |
| 90%        | 17654 | 415   | 37    | 1.423E-08 | 0.443202  | 0.4105451-0.4758591 | XY           |

DV14

| percentage | Nseq  | NchrX | NchrY | p-value   | Rx        | 95% CI              | Assignment |
|------------|-------|-------|-------|-----------|-----------|---------------------|------------|
| 1.0%       | 194   | 3     | 0     | 3.46E-02  | 0.3666063 | 0.2621429 0.4710697 | XY         |
| 5.0%       | 930   | 17    | 1     | 1.85E-04  | 0.3628283 | 0.3145495-0.4111071 | XY         |
| 10%        | 1926  | 46    | 3     | 1.202E-03 | 0.481507  | 0.4135979-0.5494159 | XY         |
| 20%        | 3832  | 88    | 7     | 1.829E-03 | 0.46209   | 0.3949121-0.5292681 | XY         |
| 30%        | 5649  | 123   | 7     | 3.347E-03 | 0.435834  | 0.3724095-0.4992581 | XY         |
| 40%        | 7388  | 162   | 8     | 2.296E-03 | 0.434617  | 0.3724277-0.4968059 | XY         |
| 50%        | 9242  | 210   | 13    | 1.365E-03 | 0.450677  | 0.3864552-0.514898  | XY         |
| 60%        | 11075 | 269   | 16    | 1.309E-03 | 0.481622  | 0.4138793-0.5493638 | XY         |
| 70%        | 13016 | 313   | 20    | 1.504E-03 | 0.475956  | 0.4091404-0.5427712 | XY         |
| 80%        | 14821 | 357   | 24    | 1.794E-03 | 0.476904  | 0.4099107-0.5438973 | XY         |
| 90%        | 16614 | 394   | 27    | 1.718E-03 | 0.468729  | 0.4034615-0.5339973 | XY         |

## DV15

| percentage | Nseq | NchrX | NchrY | p-value   | Rx       | 95% CI              | Assignment                    |
|------------|------|-------|-------|-----------|----------|---------------------|-------------------------------|
| 10%        | 501  | 16    | 2     | 5.870E-03 | 0.707859 | 0.520107-0.8956115  | not assigned                  |
| 20%        | 1023 | 26    | 2     | 3.560E-03 | 0.511112 | 0.4265152-0.5957082 | XY                            |
| 30%        | 1524 | 42    | 2     | 1.892E-03 | 0.552494 | 0.4621639-0.6428245 | consistent with XY but not XX |
| 40%        | 2035 | 54    | 3     | 1.142E-03 | 0.529557 | 0.4489556-0.6101582 | consistent with XY but not XX |
| 50%        | 2541 | 60    | 4     | 4.450E-03 | 0.473994 | 0.3964223-0.5515666 | XY                            |
| 60%        | 3074 | 74    | 5     | 7.890E-03 | 0.483871 | 0.4050443-0.5626981 | XY                            |
| 70%        | 3526 | 84    | 5     | 8.992E-03 | 0.480063 | 0.4018812-0.5582449 | XY                            |
| 80%        | 4006 | 97    | 5     | 8.950E-03 | 0.489678 | 0.4085511-0.5708057 | XY                            |
| 90%        | 4521 | 113   | 6     | 8.944E-03 | 0.507158 | 0.420028-0.5942882  | XY                            |

## Vi33.16

| percentage | Nseq     | NchrX  | NchrY | p-value   | Rx        | 95% CI             | Assignment |
|------------|----------|--------|-------|-----------|-----------|--------------------|------------|
| 0.005%     | 831      | 39     | 0     | 8.61E-10  | 0.996547  | 0.8714477-1.121646 | XX         |
| 0.010%     | 1718     | 82     | 0     | 3.62E-11  | 0.9903034 | 0.8936852-1.086921 | XX         |
| 0.050%     | 8373     | 396    | 0     | 9.84E-15  | 0.9505192 | 0.8971884-1.00385  | XX         |
| 0.100%     | 16791    | 815    | 1     | 2.34E-15  | 0.9731019 | 0.9250073-1.021197 | XX         |
| 0.500%     | 83382    | 4072   | 18    | 1.56E-15  | 0.9746833 | 0.9274614-1.021905 | XX         |
| 1.000%     | 166186   | 8004   | 31    | 1.83E-15  | 0.9618736 | 0.9135125-1.010235 | XX         |
| 10%        | 1657146  | 79410  | 276   | 1.362E-15 | 0.95536   | 0.9097696-1.00096  | XX         |
| 20%        | 3314356  | 158840 | 545   | 1.343E-15 | 0.95563   | 0.909802-1.001466  | XX         |
| 30%        | 4971989  | 238512 | 863   | 1.403E-15 | 0.95665   | 0.9104886-1.002804 | XX         |
| 40%        | 6629027  | 317872 | 1126  | 1.419E-15 | 0.95621   | 0.9100958-1.002317 | XX         |
| 50%        | 8286145  | 396883 | 1415  | 1.430E-15 | 0.95504   | 0.908884-1.00119   | XX         |
| 60%        | 9944935  | 476389 | 1710  | 1.437E-15 | 0.95506   | 0.9089775-1.001151 | XX         |
| 70%        | 11604133 | 555992 | 1978  | 1.428E-15 | 0.95524   | 0.9092421-1.001247 | XX         |
| 80%        | 13265739 | 635277 | 2257  | 1.438E-15 | 0.95467   | 0.9087257-1.00062  | XX         |
| 90%        | 14920065 | 714896 | 2552  | 1.456E-15 | 0.95511   | 0.9091977-1.001021 | XX         |

## Vi33.25

| percentage | Nseq     | NchrX  | NchrY | p-value   | Rx        | 95% CI              | Assignment |
|------------|----------|--------|-------|-----------|-----------|---------------------|------------|
| 0.005%     | 773      | 35     | 0     | 1.85E-12  | 0.9459404 | 0.8432932-1.048588  | XX         |
| 0.010%     | 1496     | 65     | 0     | 6.19E-13  | 0.8957233 | 0.8127748-0.9786718 | XX         |
| 0.050%     | 7567     | 387    | 0     | 2.04E-15  | 1.048476  | 0.974721-1.122231   | XX         |
| 0.100%     | 15121    | 764    | 2     | 1.42E-15  | 1.024428  | 0.9617273-1.087129  | XX         |
| 0.500%     | 76782    | 3810   | 11    | 2.20E-16  | 0.9995461 | 0.9477283-1.051364  | XX         |
| 1.000%     | 153321   | 7652   | 24    | 2.20E-16  | 1.005286  | 0.9539849-1.056586  | XX         |
| 10%        | 1535965  | 76569  | 210   | 2.200E-16 | 1.00347   | 0.9533489-1.053597  | XX         |
| 20%        | 3073797  | 153292 | 431   | 2.250E-16 | 1.00400   | 0.953703-1.054302   | XX         |
| 30%        | 4610315  | 229911 | 630   | 2.385E-16 | 1.00373   | 0.9534349-1.054027  | XX         |
| 40%        | 6147146  | 306620 | 847   | 2.478E-16 | 1.00361   | 0.9535476-1.053674  | XX         |
| 50%        | 7683829  | 383190 | 1068  | 2.546E-16 | 1.00330   | 0.9532645-1.053329  | XX         |
| 60%        | 9221537  | 460338 | 1273  | 2.579E-16 | 1.00438   | 0.954275-1.05449    | XX         |
| 70%        | 10757264 | 537218 | 1493  | 2.624E-16 | 1.00472   | 0.954645-1.054791   | XX         |
| 80%        | 12295263 | 613929 | 1698  | 2.671E-16 | 1.00442   | 0.9543832-1.054451  | XX         |
| 90%        | 13832268 | 690630 | 1879  | 2.656E-16 | 1.00444   | 0.9543176-1.054554  | XX         |

## Vi33.26

| percentage | Nseq    | NchrX  | NchrY | p-value  | Rx       | 95% CI             | Assignment |
|------------|---------|--------|-------|----------|----------|--------------------|------------|
| 0.005%     | 748     | 49     | 0     | 1.79E-10 | 1.42903  | 1.261193-1.596868  | XX         |
| 0.010%     | 1532    | 91     | 0     | 2.91E-12 | 1.253028 | 1.122092-1.383964  | XX         |
| 0.050%     | 7607    | 395    | 1     | 9.11E-16 | 1.05112  | 0.998744-1.103497  | XX         |
| 0.100%     | 15054   | 765    | 2     | 6.54E-16 | 1.024862 | 0.9739389-1.075785 | XX         |
| 0.500%     | 75343   | 3873   | 9     | 3.98E-16 | 1.041435 | 0.986413-1.096457  | XX         |
| 1.000%     | 150888  | 7688   | 22    | 3.97E-16 | 1.032199 | 0.9771912-1.087206 | XX         |
| 10%        | 1501416 | 75678  | 233   | 2.20E-16 | 1.02011  | 0.9667298-1.07349  | XX         |
| 20%        | 3002445 | 150711 | 435   | 2.20E-16 | 1.01503  | 0.9625238 1.067538 | XX         |
| 30%        | 4501553 | 225852 | 652   | 2.20E-16 | 1.01423  | 0.9620805-1.066379 | XX         |
| 40%        | 6000587 | 300681 | 874   | 2.20E-16 | 1.01301  | 0.960837-1.065183  | XX         |

|     |          |        |      |          |         |                    |    |
|-----|----------|--------|------|----------|---------|--------------------|----|
| 50% | 7502505  | 375559 | 1079 | 2.20E-16 | 1.01184 | 0.9598288-1.063855 | XX |
| 60% | 9001408  | 450541 | 1282 | 2.20E-16 | 1.01176 | 0.9596738-1.063845 | XX |
| 70% | 10504031 | 525848 | 1463 | 2.20E-16 | 1.01189 | 0.9598176-1.063952 | XX |
| 80% | 12005484 | 600665 | 1678 | 2.20E-16 | 1.01133 | 0.9591612-1.063491 | XX |
| 90% | 13507881 | 675714 | 1894 | 2.20E-16 | 1.01118 | 0.9590279-1.063322 | XX |

Mezmaiskaya-E733

| percentage | Nseq     | NchrX   | NchrY | p-value   | Rx        | 95% CI              | Assignment |
|------------|----------|---------|-------|-----------|-----------|---------------------|------------|
| 0.005%     | 1160     | 59      | 0     | 2.71E-11  | 1.020971  | 0.9378799-1.104062  | XX         |
| 0.01%      | 2304     | 122     | 0     | 2.38E-13  | 1.05654   | 0.9887535-1.124327  | XX         |
| 0.05%      | 11850    | 583     | 3     | 1.09E-13  | 0.9730139 | 0.9132497-1.032778  | XX         |
| 0.10%      | 23621    | 1169    | 5     | 4.24E-14  | 0.9779138 | 0.9258637-1.029964  | XX         |
| 0.50%      | 118072   | 5677    | 23    | 1.26E-14  | 0.9489887 | 0.901364-0.9966133  | XX         |
| 1.0%       | 235646   | 11197   | 41    | 8.87E-15  | 0.9371548 | 0.8904988-0.9838108 | XX         |
| 10%        | 2350323  | 111076  | 361   | 1.291E-14 | 0.93098   | 0.8843402-0.977624  | XX         |
| 20%        | 4701873  | 222403  | 720   | 1.249E-14 | 0.93180   | 0.8851319 0.9784763 | XX         |
| 30%        | 7054119  | 333845  | 1092  | 1.261E-14 | 0.93248   | 0.8856109-0.9793581 | XX         |
| 40%        | 9407022  | 446074  | 1461  | 1.237E-14 | 0.93445   | 0.8875505-0.9813509 | XX         |
| 50%        | 11761451 | 557127  | 1830  | 1.232E-14 | 0.93360   | 0.8866311-0.9805715 | XX         |
| 60%        | 14114485 | 668501  | 2212  | 1.211E-14 | 0.93352   | 0.8865398-0.9805043 | XX         |
| 70%        | 16469287 | 779836  | 2552  | 1.219E-14 | 0.93328   | 0.8862796-0.9802765 | XX         |
| 80%        | 18822197 | 891098  | 2878  | 1.209E-14 | 0.93310   | 0.8861693-0.9800291 | XX         |
| 90%        | 21174747 | 1002156 | 3240  | 1.203E-14 | 0.93283   | 0.8858725-0.9797855 | XX         |

Denisova\_4

| percentage | Nseq | NchrX | NchrY | p-value   | Rx       | 95% CI              | Assignment                    |
|------------|------|-------|-------|-----------|----------|---------------------|-------------------------------|
| 1.0%       | 387  | 18    | 0     | 5.01E-10  | 1.017644 | 0.9077111-1.127576  | XX                            |
| 10%        | 3871 | 146   | 11    | 1.198E-13 | 0.80002  | 0.7237437-0.8762879 | consistent with XX but not XY |
| 20%        | 7676 | 240   | 17    | 7.419E-13 | 0.64665  | 0.5970482-0.6962575 | consistent with XY but not XX |

|     |       |     |    |           |         |                     |                               |
|-----|-------|-----|----|-----------|---------|---------------------|-------------------------------|
| 30% | 11444 | 348 | 29 | 4.998E-13 | 0.6311  | 0.579784-0.6824246  | consistent with XY but not XX |
| 40% | 15371 | 455 | 43 | 7.942E-13 | 0.61622 | 0.5669924-0.6654559 | consistent with XY but not XX |
| 50% | 19307 | 544 | 48 | 9.522E-13 | 0.58384 | 0.5382838-0.6293962 | consistent with XY but not XX |
| 60% | 23177 | 639 | 53 | 1.043E-12 | 0.57345 | 0.5257545 0.6211421 | consistent with XY but not XX |
| 70% | 26947 | 738 | 61 | 1.176E-12 | 0.57092 | 0.5220003-0.6198375 | consistent with XY but not XX |
| 80% | 30772 | 836 | 66 | 1.334E-12 | 0.56771 | 0.5173034-0.6181113 | consistent with XY but not XX |
| 90% | 34598 | 919 | 73 | 2.006E-12 | 0.55397 | 0.5054343-0.602513  | consistent with XY but not XX |

#### Denisova\_8

| percentage | Nseq   | NchrX | NchrY | p-value  | Rx       | 95% CI              | Assignment |
|------------|--------|-------|-------|----------|----------|---------------------|------------|
| 0.10%      | 844    | 22    | 3     | 1.63E-08 | 0.537341 | 0.4814121-0.5932704 | XY         |
| 0.50%      | 4134   | 109   | 9     | 1.11E-11 | 0.534998 | 0.4942734-0.5757227 | XY         |
| 1.0%       | 8327   | 219   | 21    | 6.55E-12 | 0.532025 | 0.4951636-0.5688855 | XY         |
| 10%        | 82798  | 2152  | 189   | 1.60E-12 | 0.524    | 0.4905408-0.5574825 | XY         |
| 20%        | 165765 | 4321  | 388   | 1.13E-12 | 0.526    | 0.4914798-0.5605984 | XY         |
| 30%        | 248185 | 6516  | 610   | 1.13E-12 | 0.5297   | 0.4950236-0.56431   | XY         |
| 40%        | 330890 | 8750  | 791   | 9.48E-13 | 0.5338   | 0.4987424-0.5687977 | XY         |
| 50%        | 413459 | 10903 | 975   | 1.16E-12 | 0.532    | 0.4972982-0.5667665 | XY         |
| 60%        | 496174 | 13020 | 1146  | 1.15E-12 | 0.5293   | 0.4946863-0.5640087 | XY         |
| 70%        | 578657 | 15183 | 1321  | 1.14E-12 | 0.5296   | 0.4946635-0.5644783 | XY         |
| 80%        | 661313 | 17416 | 1501  | 1.07E-12 | 0.5317   | 0.4964801-0.5669287 | XY         |
| 90%        | 743707 | 19536 | 1674  | 1.12E-12 | 0.5301   | 0.4952071-0.5650191 | XY         |

#### Ajv52

| percentage | Nseq | NchrX | NchrY | p-value   | Rx        | 95% CI              | Assignment                    |
|------------|------|-------|-------|-----------|-----------|---------------------|-------------------------------|
| 0.02%      | 849  | 24    | 0     | 1.31E-12  | 0.6250158 | 0.5245244-0.7255073 | consistent with XY but not XX |
| 0.05%      | 1990 | 47    | 3     | 9.46E-12  | 0.4938456 | 0.4437614-0.5439298 | XY                            |
| 0.10%      | 4083 | 98    | 5     | 5.596E-12 | 0.499709  | 0.4420859-0.5573321 | XY                            |

|       |         |       |      |           |           |                     |    |
|-------|---------|-------|------|-----------|-----------|---------------------|----|
| 0.50% | 20325   | 516   | 54   | 1.24E-12  | 0.5101345 | 0.4782383-0.5420307 | XY |
| 1.00% | 40310   | 1063  | 97   | 7.665E-13 | 0.52948   | 0.4974852-0.5614806 | XY |
| 10%   | 403737  | 10904 | 1021 | 5.039E-13 | 0.543791  | 0.5095086-0.5780724 | XY |
| 20%   | 808864  | 21974 | 1931 | 5.228E-13 | 0.547188  | 0.5123618-0.5820137 | XY |
| 30%   | 1213600 | 33168 | 2892 | 4.879E-13 | 0.550079  | 0.5153011-0.584857  | XY |
| 40%   | 1617609 | 44068 | 3857 | 5.188E-13 | 0.548413  | 0.5134458-0.5833793 | XY |
| 50%   | 2023393 | 55196 | 4755 | 4.910E-13 | 0.549002  | 0.5141578-0.583846  | XY |
| 60%   | 2427784 | 66239 | 5726 | 4.934E-13 | 0.548929  | 0.5142452-0.583613  | XY |
| 70%   | 2832302 | 77239 | 6660 | 5.052E-13 | 0.54857   | 0.5139887-0.5831507 | XY |
| 80%   | 3236964 | 88145 | 7624 | 5.111E-13 | 0.547786  | 0.513134-0.5824381  | XY |
| 90%   | 3641609 | 99218 | 8591 | 5.121E-13 | 0.548069  | 0.513408-0.5827303  | XY |

Ajv53

| percentage | Nseq   | NchrX | NchrY | p-value   | Rx       | 95% CI                 | Assignment |
|------------|--------|-------|-------|-----------|----------|------------------------|------------|
| 0.10%      | 825    | 42    | 0     | 2.638E-10 | 1.036965 | 0.9553515-<br>1.118578 | XX         |
| 0.50%      | 8474   | 433   | 0     | 1.81E-13  | 1.063543 | 1.002122-1.124964      | XX         |
| 1.00%      | 4245   | 223   | 0     | 4.317E-15 | 1.03920  | 0.9818309-<br>1.096574 | XX         |
| 10%        | 85077  | 4459  | 15    | 2.504E-16 | 1.0697   | 1.007618-1.131779      | XX         |
| 20%        | 170561 | 8930  | 25    | 2.200E-16 | 1.06829  | 1.006185-1.130394      | XX         |
| 30%        | 255434 | 13353 | 34    | 2.273E-16 | 1.06469  | 1.004692-1.12469       | XX         |
| 40%        | 340897 | 17930 | 44    | 2.200E-16 | 1.07176  | 1.010745-1.132777      | XX         |
| 50%        | 425687 | 22333 | 57    | 2.200E-16 | 1.06967  | 1.008418-1.130931      | XX         |
| 60%        | 510138 | 26721 | 69    | 2.200E-16 | 1.06792  | 1.007435-1.128411      | XX         |
| 70%        | 594717 | 31005 | 83    | 2.200E-16 | 1.0629   | 1.002863-1.122938      | XX         |
| 80%        | 680005 | 35478 | 95    | 2.200E-16 | 1.06392  | 1.003479-1.124355      | XX         |
| 90%        | 765666 | 39914 | 111   | 2.200E-16 | 1.06311  | 1.002399-1.123827      | XX         |

## Ajr70

| percentage | Nseq    | NchrX  | NchrY | p-value   | Rx        | 95% CI              | Assignment                    |
|------------|---------|--------|-------|-----------|-----------|---------------------|-------------------------------|
| 0.01%      | 723     | 17     | 2     | 2.06E-07  | 0.5265555 | 0.3979983-0.6551127 | consistent with XY but not XX |
| 0.02%      | 1398    | 37     | 2     | 3.81E-09  | 0.5703843 | 0.4560453-0.6847233 | consistent with XY but not XX |
| 0.05%      | 3522    | 94     | 8     | 1.62E-10  | 0.5345562 | 0.4780996-0.5910128 | XY                            |
| 0.10%      | 7088    | 185    | 17    | 2.274E-11 | 0.5162036 | 0.4796304-0.5527768 | XY                            |
| 0.50%      | 35791   | 879    | 82    | 9.52E-12  | 0.4786992 | 0.4538688-0.5035296 | XY                            |
| 1.00%      | 71403   | 1775   | 153   | 7.654E-12 | 0.4838605 | 0.4592876-0.5084334 | XY                            |
| 10%        | 710404  | 18119  | 1605  | 3.573E-12 | 0.49634   | 0.4732067-0.5194673 | XY                            |
| 20%        | 1421733 | 36307  | 3191  | 3.533E-12 | 0.49676   | 0.4739195-0.5196086 | XY                            |
| 30%        | 2133546 | 54587  | 4743  | 3.534E-12 | 0.4977    | 0.4747453-0.5206557 | XY                            |
| 40%        | 2844037 | 72813  | 6278  | 3.324E-12 | 0.49818   | 0.4752068-0.5211489 | XY                            |
| 50%        | 3555449 | 91065  | 7859  | 3.356E-12 | 0.49843   | 0.4753636-0.5214891 | XY                            |
| 60%        | 4267104 | 109141 | 9439  | 3.420E-12 | 0.49789   | 0.4746514-0.5211252 | XY                            |
| 70%        | 4978033 | 127312 | 10947 | 3.507E-12 | 0.49779   | 0.4745457-0.5210339 | XY                            |
| 80%        | 5689336 | 145528 | 12516 | 3.562E-12 | 0.49778   | 0.474582-0.5209846  | XY                            |
| 90%        | 6400159 | 163772 | 14115 | 3.544E-12 | 0.49800   | 0.4747118-0.5212897 | XY                            |

## Gok4

| percentage | Nseq   | NchrX | NchrY | p-value   | Rx        | 95% CI              | Assignment |
|------------|--------|-------|-------|-----------|-----------|---------------------|------------|
| 0.02%      | 347    | 7     | 0     | 5.53E-09  | 0.430441  | 0.378536-0.482346   | XY         |
| 0.05%      | 882    | 15    | 2     | 1.03E-10  | 0.3718528 | 0.3189595-0.4247461 | XY         |
| 0.10%      | 1707   | 39    | 4     | 1.56E-11  | 0.4596587 | 0.4265085-0.492809  | XY         |
| 0.50%      | 8723   | 211   | 25    | 1.51E-12  | 0.4858241 | 0.4534991-0.518149  | XY         |
| 1.00%      | 17517  | 455   | 55    | 8.83E-13  | 0.5225928 | 0.4895527-0.5556328 | XY         |
| 10%        | 175452 | 4560  | 414   | 1.186E-12 | 0.52064   | 0.4886705-0.5526025 | XY         |
| 20%        | 351756 | 9251  | 792   | 8.677E-13 | 0.52577   | 0.4948587-0.5566833 | XY         |
| 30%        | 527149 | 13934 | 1167  | 8.051E-13 | 0.52861   | 0.4974395-0.5597833 | XY         |
| 40%        | 702369 | 18611 | 1582  | 7.681E-13 | 0.53018   | 0.4985844-0.5617739 | XY         |
| 50%        | 877938 | 23286 | 1990  | 7.846E-13 | 0.53086   | 0.4989706-0.5627395 | XY         |

|     |         |       |      |           |         |                     |    |
|-----|---------|-------|------|-----------|---------|---------------------|----|
| 60% | 1053125 | 27936 | 2362 | 7.890E-13 | 0.53091 | 0.4988983-0.5629283 | XY |
| 70% | 1228333 | 32523 | 2784 | 8.797E-13 | 0.52972 | 0.4976638-0.5617757 | XY |
| 80% | 1402892 | 37257 | 3137 | 8.433E-13 | 0.53137 | 0.4992595-0.5634815 | XY |
| 90% | 1578923 | 41967 | 3547 | 8.243E-13 | 0.53202 | 0.4997071-0.5643345 | XY |

Gok5

| percentage | Nseq   | NchrX | NchrY | p-value   | Rx        | 95% CI              | Assignment |
|------------|--------|-------|-------|-----------|-----------|---------------------|------------|
| 0.10%      | 775    | 36    | 0     | 1.52E-08  | 0.9678954 | 0.8332105-1.10258   | XX         |
| 0.50%      | 3761   | 168   | 1     | 1.87E-11  | 0.8757053 | 0.8151647-0.9362458 | XX         |
| 1.00%      | 7511   | 354   | 1     | 1.54E-12  | 0.9274771 | 0.8699967-0.9849575 | XX         |
| 10%        | 76260  | 3610  | 4     | 7.557E-13 | 0.93325   | 0.8742538-0.9922549 | XX         |
| 20%        | 152746 | 7181  | 6     | 5.167E-13 | 0.9259    | 0.8684543-0.9833475 | XX         |
| 30%        | 228642 | 10720 | 8     | 4.342E-13 | 0.92245   | 0.8664199-0.9784828 | XX         |
| 40%        | 304778 | 14181 | 10    | 4.712E-13 | 0.91473   | 0.859332-0.9701317  | XX         |
| 50%        | 381087 | 17654 | 13    | 5.015E-13 | 0.9104    | 0.8552204-0.9655868 | XX         |
| 60%        | 457126 | 21038 | 15    | 5.427E-13 | 0.90438   | 0.8493672-0.9593871 | XX         |
| 70%        | 532717 | 24480 | 18    | 5.633E-13 | 0.90337   | 0.8481203-0.9586204 | XX         |
| 80%        | 609003 | 28017 | 19    | 5.660E-13 | 0.90439   | 0.8489899-0.9597986 | XX         |
| 90%        | 684749 | 31445 | 21    | 6.184E-13 | 0.90314   | 0.8472033-0.959085  | XX         |

Gok7

| percentage | Nseq   | NchrX | NchrY | p-value   | Rx        | 95% CI              | Assignment                    |
|------------|--------|-------|-------|-----------|-----------|---------------------|-------------------------------|
| 0.10%      | 544    | 21    | 0     | 4.28E-07  | 0.7703463 | 0.6853565-0.8553361 | consistent with XX but not XY |
| 0.50%      | 2760   | 137   | 0     | 4.47E-10  | 0.98671   | 0.9025912-1.070829  | XX                            |
| 1.00%      | 5431   | 264   | 0     | 6.27E-11  | 0.9584038 | 0.8881479-1.02866   | XX                            |
| 10%        | 55075  | 2494  | 1     | 8.650E-12 | 0.8931    | 0.8288183-0.9573725 | XX                            |
| 20%        | 110616 | 4936  | 1     | 8.524E-12 | 0.87814   | 0.8164303-0.9398433 | XX                            |
| 30%        | 166300 | 7418  | 1     | 1.005E-11 | 0.87648   | 0.8153353-0.9376301 | XX                            |
| 40%        | 222224 | 9943  | 7     | 9.307E-12 | 0.88064   | 0.8185044-0.9427753 | XX                            |
| 50%        | 277625 | 12352 | 8     | 8.154E-12 | 0.87498   | 0.814303-0.9356504  | XX                            |



|     |        |       |    |           |         |                     |    |
|-----|--------|-------|----|-----------|---------|---------------------|----|
| 60% | 333770 | 14764 | 12 | 7.515E-12 | 0.86982 | 0.8099254-0.9297081 | XX |
| 70% | 389566 | 17244 | 14 | 6.832E-12 | 0.87056 | 0.8107012-0.9304268 | XX |
| 80% | 444747 | 19614 | 19 | 7.058E-12 | 0.86697 | 0.8074716-0.92646   | XX |
| 90% | 501179 | 22113 | 23 | 6.686E-12 | 0.86741 | 0.8079989-0.9268158 | XX |

Ire8

| percentage | Nseq    | NchrX | NchrY | p-value   | Rx        | 95% CI              | Assignment                    |
|------------|---------|-------|-------|-----------|-----------|---------------------|-------------------------------|
| 0.02%      | 427     | 10    | 0     | 2.66E-10  | 0.5435115 | 0.4315329-0.65549   | with XY but not XX            |
| 0.05%      | 1112    | 26    | 0     | 3.95E-12  | 0.5045376 | 0.4274472-0.5816281 | XY                            |
| 0.10%      | 2221    | 55    | 1     | 2.01E-12  | 0.5202778 | 0.4496646-0.5908909 | XY                            |
| 0.50%      | 11403   | 308   | 26    | 1.40E-12  | 0.5418092 | 0.5082927-0.5753257 | XY                            |
| 1.00%      | 22607   | 607   | 43    | 8.71E-13  | 0.549303  | 0.5110205-0.5875854 | XY                            |
| 10%        | 225732  | 6230  | 487   | 4.884E-13 | 0.56186   | 0.5220335-0.6016769 | consistent with XY but not XX |
| 20%        | 451304  | 12279 | 972   | 5.334E-13 | 0.55321   | 0.5145946-0.591832  | XY                            |
| 30%        | 677165  | 18325 | 1463  | 6.449E-13 | 0.55018   | 0.511359-0.5890057  | XY                            |
| 40%        | 902223  | 24273 | 1960  | 7.014E-13 | 0.54639   | 0.5080203-0.5847599 | XY                            |
| 50%        | 1127689 | 30219 | 2466  | 7.182E-13 | 0.54408   | 0.506302-0.581863   | XY                            |
| 60%        | 1354133 | 36158 | 2934  | 7.521E-13 | 0.54218   | 0.5042427-0.5801267 | XY                            |
| 70%        | 1579648 | 42168 | 3401  | 7.679E-13 | 0.54183   | 0.5040396-0.57963   | XY                            |
| 80%        | 1805001 | 48223 | 3911  | 7.659E-13 | 0.54224   | 0.504543-0.5799337  | XY                            |
| 90%        | 2031301 | 54375 | 4400  | 7.518E-13 | 0.54355   | 0.5055302-0.5815689 | XY                            |
