# Supplementary material for: A Molecular Approach to the Sexing of the Triple Burial at the Upper Paleolithic Site of Dolní Věstonice
Source: PubMed Central journal article supplement (PMC5051676; doi:10.1371/journal.pone.0163019), 2016-10-05
Supplement: pone.0163019.s008.pdf [file pone.0163019.s008.pdf]

**Table S5. Sex assignment by artificially adding contaminated reads to the Vi33.26 (female) from a present-day 1000 Genome male sample HG00096**

| Percentage | p-value  | Rx       | 95%CI                   | Assignment                    |
|------------|----------|----------|-------------------------|-------------------------------|
| 1%         | 2.20E-16 | 1.005933 | 0.9540686-1.057798      | XX                            |
| 5%         | 2.20E-16 | 0.986106 | 0.9352691-1.036943      | XX                            |
| 10%        | 2.20E-16 | 0.962039 | 0.9123184-1.011759      | XX                            |
| 15%        | 2.52E-16 | 0.937955 | 0.8894453-<br>0.9864649 | XX                            |
| 20%        | 3.03E-16 | 0.914043 | 0.8666756-<br>0.9614113 | XX                            |
| 25%        | 3.89E-16 | 0.890217 | 0.8439857-<br>0.9364485 | XX                            |
| 30%        | 5.22E-16 | 0.866112 | 0.8210635-<br>0.9111611 | XX                            |
| 35%        | 7.43E-16 | 0.841756 | 0.7978319-<br>0.8856796 | consistent with XX but not XY |
| 40%        | 1.11E-15 | 0.817907 | 0.7751619-<br>0.8606522 | consistent with XX but not XY |
| 45%        | 1.70E-15 | 0.793689 | 0.7521696-<br>0.8352082 | consistent with XX but not XY |
| 50%        | 2.64E-15 | 0.770326 | 0.7298829-<br>0.8107689 | consistent with XX but not XY |
| 55%        | 4.31E-15 | 0.74605  | 0.7068855-<br>0.7852138 | not assigned                  |
| 60%        | 7.23E-15 | 0.721947 | 0.6839785-<br>0.7599163 | not assigned                  |
| 65%        | 1.22E-14 | 0.698194 | 0.6613316-<br>0.7350569 | not assigned                  |
| 70%        | 2.09E-14 | 0.674176 | 0.6385784-<br>0.7097739 | not assigned                  |
| 75%        | 3.68E-14 | 0.650088 | 0.6156972-<br>0.6844791 | not assigned                  |
| 80%        | 6.40E-14 | 0.626195 | 0.5931153-<br>0.6592752 | consistent with XY but not XX |

Assignment was performed with reads with a mapping quality higher than 30. Percentage: the percentage of random contaminated reads added into Vi33.26; p-value: F-statistic p-value in linear regression of the number of reference reads with number of mapped reads.
