# Supplementary material for: A Molecular Approach to the Sexing of the Triple Burial at the Upper Paleolithic Site of Dolní Věstonice
Source: PLOS journal article supplement (doi:10.1371/journal.pone.0163019), 2016-10-05
Supplement: S2 (10.1371/journal.pone.0163019.s002) [file journal.pone.0163019.s002]

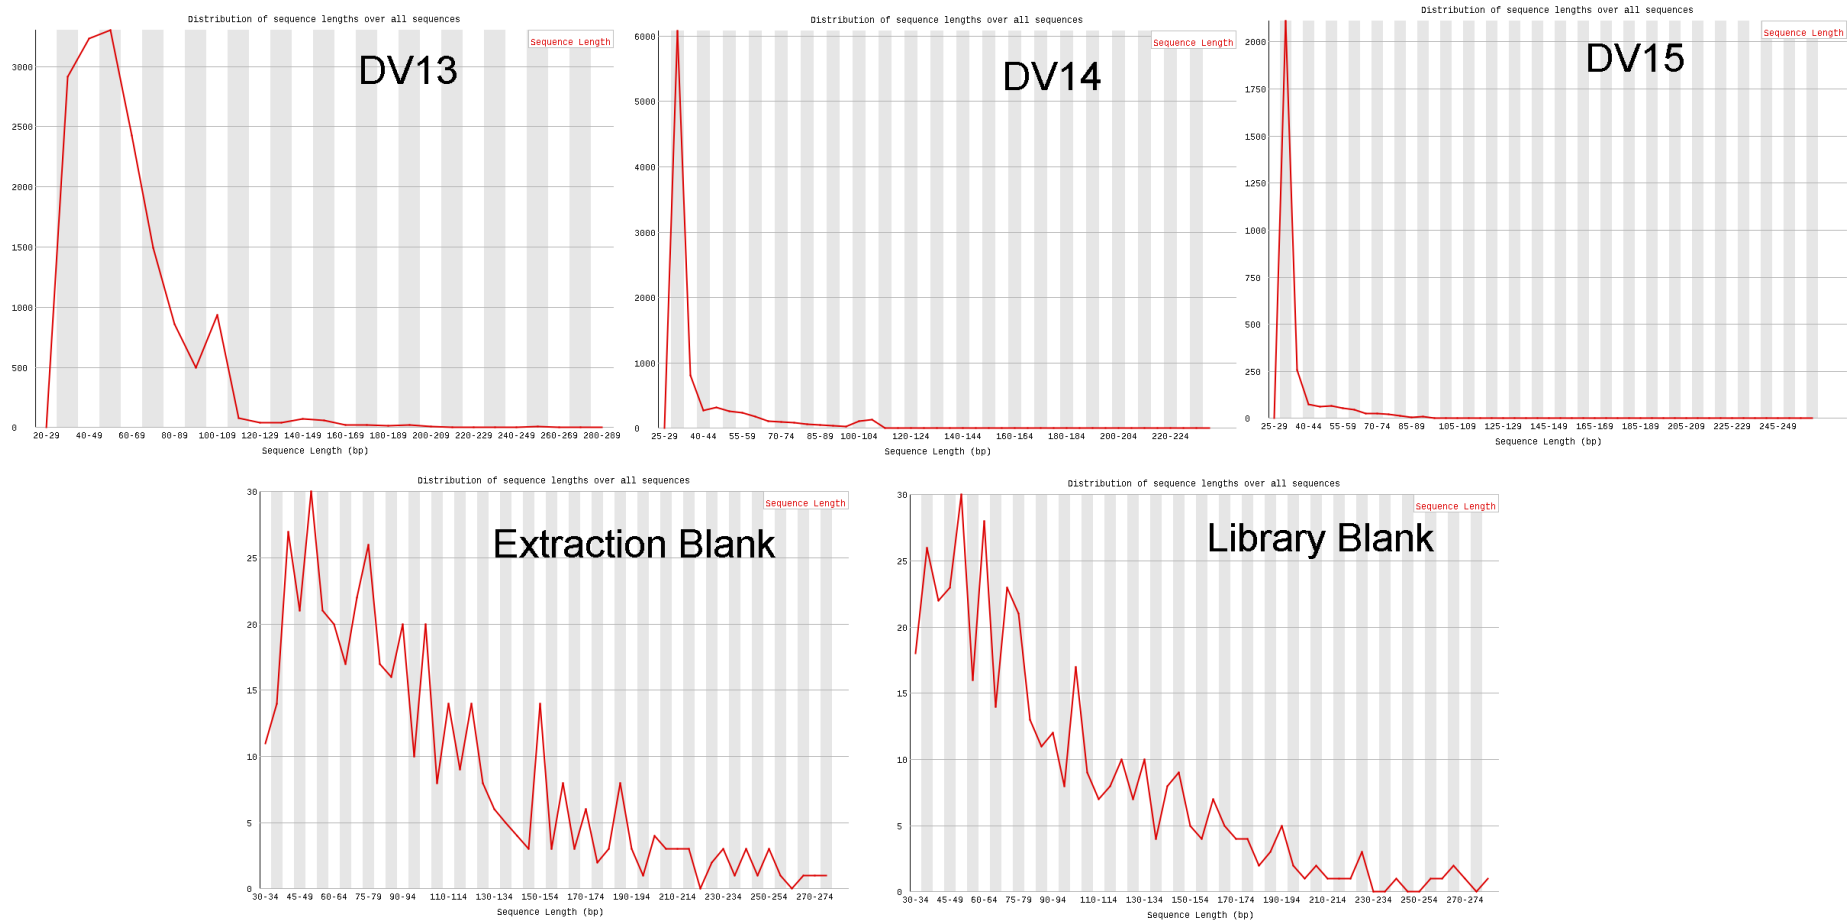

**Figure S2. Read length distribution.** Distribution of reads mapping to hg19. Negative controls show an excess of unspecific mapping reads under 30bp.
